# Supplementary material for: Landscape Use and Co-Occurrence Patterns of Neotropical Spotted Cats
Source: PubMed Central journal article supplement (PMC5215768; doi:10.1371/journal.pone.0168441), 2017-01-04
Supplement: pone.0168441.s002.pdf [file pone.0168441.s002.pdf]

**S2 Figure. Photos of the cuticular impressions of each Neotropical spotted cat at 400x magnification.**

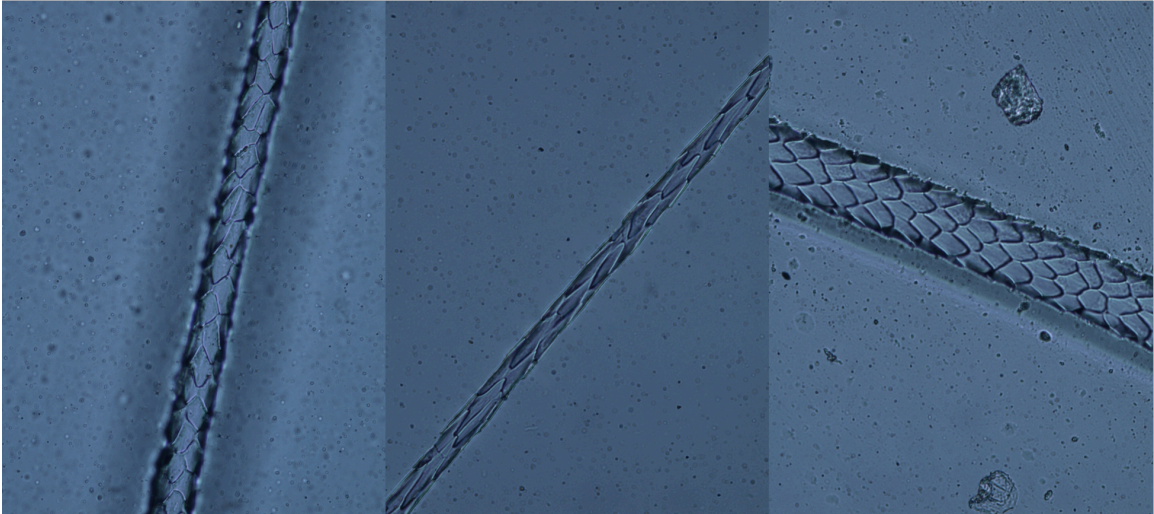

From the left to the right: ocelot (*Leopardus pardalis*), margay (*L. wiedii*), and oncilla (*L. guttulus*).
