# Supplementary material for: Landscape Use and Co-Occurrence Patterns of Neotropical Spotted Cats
Source: PubMed Central journal article supplement (PMC5215768; doi:10.1371/journal.pone.0168441), 2017-01-04
Supplement: pone.0168441.s004.pdf [file pone.0168441.s004.pdf]

**Nagy-Reis, M.B.; Nichols, J.D.; Chiarello, A.G.; Ribeiro, M.C.; Setz, E.Z.F. Landscape Use and Co-occurrence Patterns of Neotropical Spotted Cats - Supporting Information**

S2 Table. Spearman's correlation matrix for the site covariates measured at a large Atlantic Forest remnant in Brazil.

|             | Elev<br>500 | Elev<br>1000 | Hydro<br>500 | Hydro<br>1000 | Roads<br>500 | Roads<br>1000 | Veg<br>500 | Veg<br>1000* | S<br>prey | O<br>prey*   |
|-------------|-------------|--------------|--------------|---------------|--------------|---------------|------------|--------------|-----------|--------------|
| Elev500     | -           | -            | -0.07        | 0.03          | 0.19         | -0.13         | 0.25       | <b>0.54</b>  | 0.21      | <b>-0.82</b> |
| Elev1000    | -           | -            | 0.03         | 0.11          | 0.20         | -0.12         | 0.27       | <b>0.58</b>  | 0.20      | <b>-0.81</b> |
| Hydro500    |             |              | -            | -             | 0.07         | -0.12         | 0.23       | 0.18         | 0.06      | 0.26         |
| Hydro1000   |             |              | -            | -             | 0.01         | -0.24         | 0.34       | 0.26         | -0.01     | 0.27         |
| Roads500    |             |              |              |               | -            | -             | -0.20      | -0.14        | 0.35      | 0.33         |
| Roads1000   |             |              |              |               | -            | -             | -0.35      | -0.39        | 0.33      | 0.23         |
| Veg500      |             |              |              |               |              |               | -          | -            | -0.25     | -0.26        |
| Veg1000     |             |              |              |               |              |               | -          | -            | -0.16     | -0.04        |
| S prey      |             |              |              |               |              |               |            |              | -         | -            |
| Ocelot prey |             |              |              |               |              |               |            |              | -         | -            |

The four landscape site covariates (elevation, hydrographic density, road density and percentage of high-quality forest cover) were measured at 500 and 1,000 m spatial scales (buffer sizes). Highly correlated ( $r < 0.50$ ) outcomes are in bold. S prey = prey index for margay and oncilla; O prey = prey index for ocelot; \* = excluded covariates.
