# Supplementary material for: Landscape Use and Co-Occurrence Patterns of Neotropical Spotted Cats
Source: PubMed Central journal article supplement (PMC5215768; doi:10.1371/journal.pone.0168441), 2017-01-04
Supplement: pone.0168441.s006.pdf [file pone.0168441.s006.pdf]

**Nagy-Reis, M.B.; Nichols, J.D.; Chiarello, A.G.; Ribeiro, M.C.; Setz, E.Z.F. Landscape Use and Co-occurrence Patterns of Neotropical Spotted Cats - Supporting Information**

S4 Table. Model selection analysis for detection probability ( $p$ ) covariates for three Neotropical spotted cats at a large Atlantic Forest remnant in Brazil.

| Model                        | AICc   | $\Delta$ AIC | $w_i$ | K | -2LL   |
|------------------------------|--------|--------------|-------|---|--------|
| <b>Ocelot</b>                |        |              |       |   |        |
| $\psi(.) p(.)$               | 148.14 | 0            | 0.48  | 2 | 143.85 |
| $\psi(.) p(\text{campaign})$ | 149.06 | 0.92         | 0.30  | 4 | 140.06 |
| $\psi(.) p(\text{method})$   | 150.37 | 2.23         | 0.16  | 3 | 143.78 |
| $\psi(.) p(\text{groups})$   | 152.07 | 3.93         | 0.07  | 4 | 143.07 |
| <b>Margay</b>                |        |              |       |   |        |
| $\psi(.) p(\text{method})$   | 197.68 | 0            | 0.75  | 3 | 191.09 |
| $\psi(.) p(.)$               | 200.47 | 2.79         | 0.19  | 2 | 196.18 |
| $\psi(.) p(\text{groups})$   | 203.53 | 5.85         | 0.04  | 4 | 194.53 |
| $\psi(.) p(\text{campaign})$ | 204.47 | 6.79         | 0.03  | 4 | 195.47 |
| <b>Oncilla</b>               |        |              |       |   |        |
| $\psi(.) p(\text{method})$   | 250.10 | 0            | 0.50  | 3 | 243.51 |
| $\psi(.) p(\text{campaign})$ | 251.23 | 1.13         | 0.29  | 4 | 242.23 |
| $\psi(.) p(.)$               | 252.09 | 1.99         | 0.19  | 2 | 247.80 |
| $\psi(.) p(\text{groups})$   | 256.27 | 6.17         | 0.02  | 4 | 247.27 |

“Campaign” = campaign in which data was collected (1- April 2013 to September 2013; 2- October 2013 to March 2014; 3- April 2014 to September 2014); “Groups” = order within the campaigns that sampling sites were surveyed; “Method” = method used in each sampling occasion (camera trapping or scat sampling); “.” = no covariate included (i.e., null model).
