# Supplementary material for: Landscape Use and Co-Occurrence Patterns of Neotropical Spotted Cats
Source: PubMed Central journal article supplement (PMC5215768; doi:10.1371/journal.pone.0168441), 2017-01-04
Supplement: pone.0168441.s007.pdf [file pone.0168441.s007.pdf]

**Nagy-Reis, M.B.; Nichols, J.D.; Chiarello, A.G.; Ribeiro, M.C.; Setz, E.Z.F. Landscape Use and Co-occurrence Patterns of Neotropical Spotted Cats - Supporting Information**

S5 Table. Model selection analysis for occupancy ( $\psi$ ) covariates (elevation, percentage of high-quality forest cover, hydrographic density and road density) measured at different spatial scales (buffer sizes) for three Neotropical spotted cats at a large Atlantic Forest remnant in Brazil.

| Model                                       | AICc   | $\Delta$ AICc | $w_i$ | K | -2LL   |
|---------------------------------------------|--------|---------------|-------|---|--------|
| <b>ELEVATION</b>                            |        |               |       |   |        |
| <b>Ocelot</b>                               |        |               |       |   |        |
| $\psi(\cdot) p(\text{general})$             | 154.78 | 0             | 0.64  | 5 | 143.24 |
| $\psi(\text{elev}500) p(\text{general})$    | 157.28 | 2.50          | 0.18  | 6 | 143.07 |
| $\psi(\text{elev}1000) p(\text{general})$   | 157.42 | 2.64          | 0.17  | 6 | 143.21 |
| <b>Margay</b>                               |        |               |       |   |        |
| $\psi(\cdot) p(\text{general})$             | 202.20 | 0             | 0.61  | 5 | 190.66 |
| $\psi(\text{elev}500) p(\text{general})$    | 204.30 | 2.10          | 0.21  | 6 | 190.09 |
| $\psi(\text{elev}1000) p(\text{general})$   | 204.71 | 2.51          | 0.17  | 6 | 190.50 |
| <b>Oncilla</b>                              |        |               |       |   |        |
| $\psi(\cdot) p(\text{general})$             | 252.75 | 0             | 0.62  | 5 | 241.21 |
| $\psi(\text{elev}500) p(\text{general})$    | 255.07 | 2.32          | 0.19  | 6 | 240.86 |
| $\psi(\text{elev}1000) p(\text{general})$   | 255.15 | 2.40          | 0.19  | 6 | 240.94 |
| <b>HIGH-QUALITY FOREST COVER</b>            |        |               |       |   |        |
| <b>Ocelot</b>                               |        |               |       |   |        |
| $\psi(\cdot) p(\text{general})$             | 154.78 | 0             | 0.45  | 5 | 143.24 |
| $\psi(\text{forest}500) p(\text{general})$  | 154.86 | 0.08          | 0.43  | 6 | 140.65 |
| $\psi(\text{forest}1000) p(\text{general})$ | 157.35 | 2.57          | 0.12  | 6 | 143.14 |
| <b>Margay</b>                               |        |               |       |   |        |
| $\psi(\cdot) p(\text{general})$             | 202.20 | 0             | 0.60  | 5 | 190.66 |
| $\psi(\text{forest}1000) p(\text{general})$ | 204.13 | 1.93          | 0.23  | 6 | 189.92 |
| $\psi(\text{forest}500) p(\text{general})$  | 204.65 | 2.45          | 0.18  | 6 | 190.44 |
| <b>Oncilla</b>                              |        |               |       |   |        |
| $\psi(\cdot) p(\text{general})$             | 252.75 | 0             | 0.58  | 5 | 241.21 |
| $\psi(\text{forest}500) p(\text{general})$  | 254.28 | 1.53          | 0.27  | 6 | 240.07 |
| $\psi(\text{forest}1000) p(\text{general})$ | 255.40 | 2.65          | 0.15  | 6 | 241.19 |
| <b>HYDROGRAPHIC DENSITY</b>                 |        |               |       |   |        |
| <b>Ocelot</b>                               |        |               |       |   |        |

|                                            |        |      |      |   |        |
|--------------------------------------------|--------|------|------|---|--------|
| $\psi(\cdot) p(\text{general})$            | 154.78 | 0    | 0.61 | 5 | 143.24 |
| $\psi(\text{hydro1000})$                   |        |      |      |   |        |
| $p(\text{general})$                        | 157.01 | 2.23 | 0.20 | 6 | 142.80 |
| $\psi(\text{hydro500}) p(\text{general})$  | 157.11 | 2.33 | 0.19 | 6 | 142.90 |
| <b>Margay</b>                              |        |      |      |   |        |
| $\psi(\text{hydro1000})$                   |        |      |      |   |        |
| $p(\text{general})$                        | 201.69 | 0    | 0.44 | 6 | 187.48 |
| $\psi(\cdot) p(\text{general})$            | 202.20 | 0.51 | 0.34 | 5 | 190.66 |
| $\psi(\text{hydro500}) p(\text{general})$  | 203.12 | 1.43 | 0.22 | 6 | 188.91 |
| <b>Oncilla</b>                             |        |      |      |   |        |
| $\psi(\cdot) p(\text{general})$            | 252.75 | 0    | 0.39 | 5 | 241.21 |
| $\psi(\text{hydro1000})$                   |        |      |      |   |        |
| $p(\text{general})$                        | 253.08 | 0.33 | 0.33 | 6 | 238.87 |
| $\psi(\text{hydro500}) p(\text{general})$  | 253.35 | 0.60 | 0.29 | 6 | 239.14 |
| ROADS DENSITY                              |        |      |      |   |        |
| <b>Ocelot</b>                              |        |      |      |   |        |
| $\psi(\cdot) p(\text{general})$            | 154.78 | 0    | 0.51 | 5 | 143.24 |
| $\psi(\text{roads500}) p(\text{general})$  | 155.86 | 1.08 | 0.30 | 6 | 141.65 |
| $\psi(\text{roads1000}) p(\text{general})$ | 156.82 | 2.04 | 0.19 | 6 | 142.61 |
| <b>Margay</b>                              |        |      |      |   |        |
| $\psi(\cdot) p(\text{general})$            | 202.20 | 0    | 0.56 | 5 | 190.66 |
| $\psi(\text{roads1000}) p(\text{general})$ | 203.49 | 1.29 | 0.29 | 6 | 189.28 |
| $\psi(\text{roads500}) p(\text{general})$  | 204.82 | 2.62 | 0.15 | 6 | 190.61 |
| <b>Oncilla</b>                             |        |      |      |   |        |
| $\psi(\cdot) p(\text{general})$            | 252.75 | 0    | 0.63 | 5 | 241.21 |
| $\psi(\text{roads500}) p(\text{general})$  | 255.02 | 2.27 | 0.20 | 6 | 240.81 |
| $\psi(\text{roads1000}) p(\text{general})$ | 255.37 | 2.62 | 0.17 | 6 | 241.16 |

$p(\text{general})$  = method + soil coverage + percentage of high-quality forest cover at 500 m buffer size.
