# Supplementary material for: Landscape Use and Co-Occurrence Patterns of Neotropical Spotted Cats
Source: PubMed Central journal article supplement (PMC5215768; doi:10.1371/journal.pone.0168441), 2017-01-04
Supplement: pone.0168441.s008.pdf [file pone.0168441.s008.pdf]

**Nagy-Reis, M.B.; Nichols, J.D.; Chiarello, A.G.; Ribeiro, M.C.; Setz, E.Z.F. Landscape Use and Co-occurrence Patterns of Neotropical Spotted Cats - Supporting Information**

S6 Table. Single-season single-species occupancy models (cumulative  $w_i > 0.80$ ) used to evaluate the effect of weighted distance to reserve border, geomorphometry, environmental, and anthropogenic landscape attributes on the habitat use of sympatric Neotropical spotted cats at a large Atlantic Forest remnant in Brazil.

| Model                                                   | $\Delta AICc$ | $w_i$ | K | -2LL   | Beta estimates          |                         |                      |                         |                         |      |
|---------------------------------------------------------|---------------|-------|---|--------|-------------------------|-------------------------|----------------------|-------------------------|-------------------------|------|
|                                                         |               |       |   |        | Elevation               | Forest cover            | Hydrography          | Roads                   | Reserve distance        | Prey |
| <b>Ocelot</b>                                           |               |       |   |        |                         |                         |                      |                         |                         |      |
| $\psi(\text{reserve dist}) p(\text{general})$           | 0             | 0.25  | 6 | 139.03 | -                       | -                       | -                    | -                       | -1.30<br>( $\pm 0.97$ ) | -    |
| $\psi(.) p(\text{general})$                             | 1.54          | 0.12  | 5 | 143.24 | -                       | -                       | -                    | -                       | -                       | -    |
| $\psi(\text{forest500}) p(\text{general})$              | 1.62          | 0.11  | 6 | 140.65 | -                       | -1.35<br>( $\pm 0.78$ ) | -                    | -                       | -                       | -    |
| $\psi(\text{reserve dist+roads1000}) p(\text{general})$ | 2.12          | 0.09  | 7 | 138.33 | -                       | -                       | -                    | -0.49<br>( $\pm 0.69$ ) | -1.46<br>( $\pm 1.39$ ) | -    |
| $\psi(\text{forest500+hydro1000}) p(\text{general})$    | 2.14          | 0.09  | 7 | 138.35 | -                       | -1.82<br>( $\pm 0.92$ ) | -0.96 ( $\pm 0.74$ ) | -                       | -                       | -    |
| $\psi(\text{reserve dist+elev1000}) p(\text{general})$  | 2.64          | 0.07  | 7 | 138.85 | -0.26<br>( $\pm 0.60$ ) | -                       | -                    | -                       | -1.38<br>( $\pm 0.95$ ) | -    |
| $\psi(\text{reserve dist+hydro1000}) p(\text{general})$ | 2.77          | 0.06  | 7 | 138.98 | -                       | -                       | -0.13 ( $\pm 0.57$ ) | -                       | -1.27<br>( $\pm 0.99$ ) | -    |
| $\psi(\text{roads1000}) p(\text{general})$              | 3.58          | 0.04  | 6 | 142.61 | -                       | -                       | -                    | -0.41<br>( $\pm 0.54$ ) | -                       | -    |
| <b>Margay</b>                                           |               |       |   |        |                         |                         |                      |                         |                         |      |

|                                                          |      |      |   |        |                         |                         |                      |                        |                         |                        |
|----------------------------------------------------------|------|------|---|--------|-------------------------|-------------------------|----------------------|------------------------|-------------------------|------------------------|
| $\psi(\text{reserve dist}) p(\text{general})$            | 0    | 0.18 | 6 | 186.39 | -                       | -                       | -                    | -                      | -1.06<br>( $\pm 0.59$ ) | -                      |
| $\psi(\text{reserve dist+hydro1000}) p(\text{general})$  | 1.09 | 0.10 | 7 | 184.66 | -                       | -                       | -1.09 ( $\pm 1.08$ ) | -                      | -0.90<br>( $\pm 0.58$ ) | -                      |
| $\psi(\text{hydro1000}) p(\text{general})$               | 1.09 | 0.10 | 6 | 187.48 | -                       | -                       | -1.41 ( $\pm 1.12$ ) | -                      | -                       | -                      |
| $\psi(.) p(\text{general})$                              | 1.60 | 0.08 | 5 | 190.66 | -                       | -                       | -                    | -                      | -                       | -                      |
| $\psi(\text{reserve dist+roads1000}) p(\text{general})$  | 1.63 | 0.08 | 7 | 185.20 | -                       | -                       | -                    | 0.64<br>( $\pm 0.67$ ) | -1.06<br>( $\pm 0.60$ ) | -                      |
| $\psi(\text{reserve dist+forest1000}) p(\text{general})$ | 2.11 | 0.06 | 7 | 185.68 | -                       | -1.00<br>( $\pm 2.44$ ) | -                    | -                      | -1.19<br>( $\pm 0.88$ ) | -                      |
| $\psi(\text{reserve dist+elev1000}) p(\text{general})$   | 2.50 | 0.05 | 7 | 186.07 | -0.36<br>( $\pm 0.70$ ) | -                       | -                    | -                      | -1.26<br>( $\pm 0.78$ ) | -                      |
| $\psi(\text{reserve dist+prey}) p(\text{general})$       | 2.73 | 0.05 | 7 | 186.30 | -                       | -                       | -                    | -                      | -0.98<br>( $\pm 0.62$ ) | 0.16<br>( $\pm 0.54$ ) |
| $\psi(\text{prey}) p(\text{general})$                    | 2.69 | 0.05 | 6 | 189.08 | -                       | -                       | -                    | -                      | -                       | 0.73<br>( $\pm 0.69$ ) |
| $\psi(\text{hydro1000+elev1000}) p(\text{general})$      | 2.78 | 0.04 | 7 | 186.35 | 0.68<br>( $\pm 0.75$ )  | -                       | -1.98 ( $\pm 1.64$ ) | -                      | -                       | -                      |
| $\psi(\text{roads1000}) p(\text{general})$               | 2.89 | 0.04 | 6 | 189.28 | -                       | -                       | -                    | 0.78<br>( $\pm 1.09$ ) | -                       | -                      |
| <b>Oncilla</b>                                           |      |      |   |        |                         |                         |                      |                        |                         |                        |
| $\psi(\text{forest500+elev1000}) p(\text{general})$      | 0    | 0.15 | 7 | 235.60 | 1.72<br>( $\pm 0.93$ )  | -3.20<br>( $\pm 0.75$ ) | -                    | -                      | -                       | -                      |
| $\psi(.) p(\text{general})$                              | 0.12 | 0.14 | 5 | 241.21 | -                       | -                       | -                    | -                      | -                       | -                      |
| $\psi(\text{hydro1000}) p(\text{general})$               | 0.45 | 0.12 | 6 | 238.87 | -                       | -                       | -0.76 ( $\pm 0.56$ ) | -                      | -                       | -                      |
| $\psi(\text{hydro1000+elev1000}) p(\text{general})$      | 1.37 | 0.07 | 7 | 236.97 | 1.29<br>( $\pm 1.26$ )  | -                       | -2.14 ( $\pm 2.20$ ) | -                      | -                       | -                      |
| $\psi(\text{forest500}) p(\text{general})$               | 1.65 | 0.06 | 6 | 240.07 | -                       | -1.06<br>( $\pm 0.97$ ) | -                    | -                      | -                       | -                      |
| $\psi(\text{hydro1000+forest500}) p(\text{general})$     | 1.79 | 0.06 | 7 | 237.39 | -                       | -0.85<br>( $\pm 0.58$ ) | -1.10 ( $\pm 0.85$ ) | -                      | -                       | -                      |
| $\psi(\text{reserve dist}) p(\text{general})$            | 1.94 | 0.06 | 6 | 240.36 | -                       | -                       | -                    | -                      | -0.39<br>( $\pm 0.42$ ) | -                      |

|                                                 |      |      |   |        |                        |   |                      |                         |   |                         |
|-------------------------------------------------|------|------|---|--------|------------------------|---|----------------------|-------------------------|---|-------------------------|
| $\psi(\text{hydro1000+prey}) p(\text{general})$ | 2.50 | 0.04 | 7 | 238.10 | -                      | - | -1.05 ( $\pm 0.73$ ) | -                       | - | -0.45<br>( $\pm 0.51$ ) |
| $\psi(\text{elev1000}) p(\text{general})$       | 2.52 | 0.04 | 6 | 240.94 | 0.22<br>( $\pm 0.43$ ) | - | -                    | -                       | - | -                       |
| $\psi(\text{roads1000}) p(\text{general})$      | 2.74 | 0.04 | 6 | 241.16 | -                      | - | -                    | -0.13<br>( $\pm 0.53$ ) | - | -                       |
| $\psi(\text{prey}) p(\text{general})$           | 2.79 | 0.04 | 6 | 241.21 | -                      | - | -                    | -                       | - | 0.03<br>( $\pm 0.49$ )  |

$p(\text{general}) = \text{method} + \text{soil coverage} + \text{percentage of high-quality forest cover at 500 m buffer size.}$
