# Supplementary material for: Landscape Use and Co-Occurrence Patterns of Neotropical Spotted Cats
Source: PubMed Central journal article supplement (PMC5215768; doi:10.1371/journal.pone.0168441), 2017-01-04
Supplement: pone.0168441.s009.pdf [file pone.0168441.s009.pdf]

**Nagy-Reis, M.B.; Nichols, J.D.; Chiarello, A.G.; Ribeiro, M.C.; Setz, E.Z.F. Landscape Use and Co-occurrence Patterns of Neotropical Spotted Cats - Supporting Information**

S7 Table. Spearman's correlation matrix for the three Neotropical spotted cats found at a large Atlantic Forest remnant in Brazil (based on the number of detection records at each sampling site).

|         | Ocelot | Margay | Oncilla |
|---------|--------|--------|---------|
| Ocelot  | -      | 0.08   | 0.01    |
| Margay  |        | -      | 0.41    |
| Oncilla |        |        | -       |
